# Supplementary material for: Chronic Diseases among Older Cancer Survivors
Source: Hindawi journal article supplement (doi:10.1155/2012/206414), 2012-01-01
Supplement: f1 [file 206414.f1.pdf]

**Supplementary Tables – Chronic diseases among older cancer survivors**

## Supplementary Tables - Chronic diseases among older cancer survivors

**e-Table 1.** Selection of ICPC codes

| Category                  | ICPC-code         |                                              |
|---------------------------|-------------------|----------------------------------------------|
| Sensory diseases          | F83               | Retinopathy                                  |
|                           | F84               | Macular degeneration                         |
|                           | F94               | Blindness                                    |
|                           | H83               | Otosclerosis                                 |
|                           | H86               | Deafness                                     |
| Cardiovascular diseases   | K74               | Ischemic heart disease with angina           |
|                           | K75               | Acute myocardial infarction                  |
|                           | K76               | Ischemic heart disease without angina        |
|                           | K77               | Heart failure                                |
|                           | K82               | Pulmonary heart disease                      |
|                           | K87               | Hypertension with organ damage               |
|                           | K90               | Stroke/cerebrovascular accident              |
|                           | K91               | Atherosclerosis                              |
|                           | K92               | Peripheral vascular disease                  |
| K93+K94                   | Venous thrombosis |                                              |
| Locomotor impairments     | L84               | Back syndrome without radiating pain         |
|                           | L85               | Acquired deformity of spine                  |
|                           | L88               | Rheumatoid/seropositive arthritis            |
|                           | L89               | Osteoarthritis hip                           |
|                           | L90               | Osteoarthritis knee                          |
|                           | L91               | Osteoarthritis other                         |
|                           | L95               | Osteoporosis                                 |
|                           | L98               | Acquired deformity of limb                   |
| Neurological - Disability | N70               | Poliomyelitis                                |
|                           | N85               | Congenital neurological anomaly              |
|                           | N86               | Multiple sclerosis                           |
|                           | N87               | Parkinsonism                                 |
|                           | N88               | Epilepsy                                     |
| Neurological - Pain       | N89               | Migraine                                     |
|                           | N90               | Cluster headache                             |
|                           | N92               | Trigeminal neuralgia                         |
| Psychological disorders   | P28               | Limited function/disability                  |
|                           | P70               | Dementia                                     |
|                           | P71               | Organic psychosis                            |
|                           | P72               | Schizophrenia                                |
|                           | P73               | Affective psychosis                          |
|                           | P74               | Anxiety disorder/anxiety state               |
|                           | P75               | Somatisation disorder                        |
|                           | P76               | Depressive disorder                          |
|                           | P77               | Suicide/suicide attempt                      |
|                           | P79               | Phobia/compulsive disorder                   |
|                           | P80               | Personality disorder                         |
|                           | P85               | Mental retardation                           |
|                           | P98               | Psychosis NOS/other                          |
| Respiratory diseases      | R91               | Chronic bronchitis                           |
|                           | R95               | Chronic obstructive pulmonary disease (COPD) |
|                           | R96               | Asthma                                       |

## Supplementary Tables - Chronic diseases among older cancer survivors

| Category            | ICPC-code |                                               |
|---------------------|-----------|-----------------------------------------------|
| Skin diseases       | S87       | Dermatitis/atopic eczema                      |
|                     | S91       | Psoriasis                                     |
|                     | S97       | Chronic ulcer skin                            |
| Endocrine diseases  | T85       | Hyperthyroidism/thyrototoxicosis              |
|                     | T86       | Hypothyroidism/myxoedema                      |
|                     | T90       | Diabetes mellitus                             |
|                     | T92       | Gout                                          |
|                     | T93       | Lipid disorders                               |
|                     | T99       | Endocrine/metabolic/nutritional disease other |
| Urogenital diseases | U04       | Incontinence urine                            |
|                     | U85       | Congenital anomaly urinary tract              |
|                     | U88       | Glomerulonephritis/nephritis                  |
|                     | Y85       | Benign prostatic hypertrophy                  |

Supplementary Tables - Chronic diseases among older cancer survivors

**e-Table 2.** Lifetime prevalence of pre-existing chronic diseases at time of cancer diagnosis or reference date

|                                       | Cancer patients |                   | Non-cancer patients |                   | P-value     | OR <sup>2</sup> | (95% CI)             |
|---------------------------------------|-----------------|-------------------|---------------------|-------------------|-------------|-----------------|----------------------|
|                                       | N               | Prev <sup>1</sup> | N                   | Prev <sup>1</sup> |             |                 |                      |
| <b>Sensory diseases</b>               |                 |                   |                     |                   |             |                 |                      |
| Retinopathy                           | 79              | 20.60             | 304                 | 25.39             | 0.07        | 0.79            | (0.62 - 1.02)        |
| Macular degeneration                  | 62              | 16.17             | 193                 | 16.12             | 0.66        | 0.94            | (0.70 - 1.25)        |
| Blindness                             | 52              | 13.56             | 139                 | 11.61             | 0.50        | 1.12            | (0.81 - 1.54)        |
| Otosclerosis                          | 16              | 4.17              | 40                  | 3.34              | 0.45        | 1.25            | (0.70 - 2.24)        |
| Deafness                              | 246             | 64.15             | 625                 | 52.20             | 0.03        | 1.19            | (1.02 - 1.39)        |
| <b>Cardiovascular diseases</b>        |                 |                   |                     |                   |             |                 |                      |
| Ischemic heart disease with angina    | 459             | 119.69            | 1326                | 110.75            | 0.73        | 1.02            | (0.91 - 1.14)        |
| Acute myocardial infarction           | 405             | 105.61            | 1162                | 97.05             | 0.86        | 1.01            | (0.90 - 1.14)        |
| Ischemic heart disease without angina | 393             | 102.48            | 1151                | 96.13             | 0.98        | 1.00            | (0.88 - 1.13)        |
| Heart failure                         | 184             | 47.98             | 508                 | 42.43             | 0.61        | 1.05            | (0.88 - 1.25)        |
| Pulmonary heart disease               | 7               | 1.83              | 19                  | 1.59              | 0.91        | 1.05            | (0.44 - 2.51)        |
| Hypertension with organ damage        | 212             | 55.28             | 706                 | 58.97             | 0.21        | 0.90            | (0.77 - 1.06)        |
| Stroke/cerebrovascular accident       | 246             | 64.15             | 841                 | 70.24             | 0.03        | 0.84            | (0.73 - 0.98)        |
| Atherosclerosis                       | 129             | 33.64             | 379                 | 31.65             | 0.95        | 0.99            | (0.81 - 1.22)        |
| Peripheral vascular disease           | 239             | 62.32             | 693                 | 57.88             | 0.82        | 1.02            | (0.87 - 1.19)        |
| Venous thrombosis                     | 131             | 34.16             | 379                 | 31.65             | 0.65        | 1.05            | (0.86 - 1.28)        |
| <b>Locomotor impairment</b>           |                 |                   |                     |                   |             |                 |                      |
| Back syndrome without radiating pain  | 281             | 73.27             | 888                 | 74.17             | 0.70        | 0.97            | (0.85 - 1.12)        |
| Acquired deformity of spine           | 111             | 28.94             | 381                 | 31.82             | 0.40        | 0.91            | (0.74 - 1.13)        |
| Rheumatoid/seropositive arthritis     | 97              | 25.29             | 389                 | 32.49             | 0.02        | 0.77            | (0.61 - 0.97)        |
| Osteoarthritis hip                    | 272             | 70.93             | 885                 | 73.92             | 0.47        | 0.95            | (0.82 - 1.09)        |
| Osteoarthritis knee                   | 312             | 81.36             | 1054                | 88.03             | 0.17        | 0.91            | (0.80 - 1.04)        |
| Osteoarthritis other                  | 184             | 47.98             | 619                 | 51.70             | 0.47        | 0.94            | (0.79 - 1.11)        |
| Osteoporosis                          | 196             | 51.11             | 674                 | 56.29             | 0.55        | 0.95            | (0.80 - 1.12)        |
| Acquired deformity of limb            | 169             | 44.07             | 531                 | 44.35             | 0.81        | 1.02            | (0.86 - 1.22)        |
| <b>Neurological - Disability</b>      |                 |                   |                     |                   |             |                 |                      |
| Poliomyelitis                         | 11              | 2.87              | 38                  | 3.17              | 0.70        | 0.88            | (0.45 - 1.72)        |
| Congenital neurological anomaly       | 6               | 1.56              | 19                  | 1.59              | 0.90        | 0.94            | (0.38 - 2.37)        |
| Multiple sclerosis                    | 4               | 1.04              | 22                  | 1.84              | 0.34        | 0.60            | (0.20 - 1.73)        |
| Parkinsonism                          | 32              | 8.34              | 145                 | 12.11             | 0.03        | 0.64            | (0.44 - 0.95)        |
| Epilepsy                              | 46              | 11.99             | 179                 | 14.95             | 0.15        | 0.79            | (0.57 - 1.09)        |
| <b>Neurological - Pain</b>            |                 |                   |                     |                   |             |                 |                      |
| Migraine                              | 66              | 17.21             | 301                 | 25.14             | 0.02        | 0.73            | (0.55 - 0.95)        |
| Cluster headache                      | 8               | 2.09              | 24                  | 2.00              | 0.96        | 1.02            | (0.46 - 2.27)        |
| Trigeminal neuralgia                  | 16              | 4.17              | 36                  | 3.01              | 0.26        | 1.41            | (0.78 - 2.55)        |
| <b>Psychological disorders</b>        |                 |                   |                     |                   |             |                 |                      |
| Limited function/disability           | 5               | 1.30              | 32                  | 2.67              | 0.13        | 0.48            | (0.19 - 1.24)        |
| Dementia                              | 60              | 15.65             | 344                 | 28.73             | <b>0.00</b> | <b>0.48</b>     | <b>(0.36 - 0.64)</b> |

## Supplementary Tables - Chronic diseases among older cancer survivors

|                                         | Cancer patients |                   | Non-cancer patients |                   | P-value     | OR <sup>2</sup> | (95% CI)             |
|-----------------------------------------|-----------------|-------------------|---------------------|-------------------|-------------|-----------------|----------------------|
|                                         | N               | Prev <sup>1</sup> | N                   | Prev <sup>1</sup> |             |                 |                      |
| Organic psychosis                       | 9               | 2.35              | 54                  | 4.51              | 0.06        | 0.51            | (0.25 - 1.04)        |
| Schizophrenia                           | 3               | 0.78              | 34                  | 2.84              | 0.03        | 0.28            | (0.08 - 0.90)        |
| Affective psychosis                     | 19              | 4.95              | 79                  | 6.60              | 0.32        | 0.78            | (0.47 - 1.28)        |
| Anxiety disorder/anxiety state          | 68              | 17.73             | 181                 | 15.12             | 0.15        | 1.23            | (0.93 - 1.63)        |
| Somatization disorder                   | 44              | 11.47             | 130                 | 10.86             | 0.71        | 1.07            | (0.76 - 1.51)        |
| Depressive disorder                     | 249             | 64.93             | 763                 | 63.73             | 0.56        | 1.05            | (0.90 - 1.21)        |
| Suicide/suicide attempt                 | 26              | 6.78              | 80                  | 6.68              | 0.81        | 1.06            | (0.68 - 1.65)        |
| Phobia/compulsive disorder              | 22              | 5.74              | 96                  | 8.02              | 0.20        | 0.74            | (0.46 - 1.18)        |
| Personality disorder                    | 21              | 5.48              | 127                 | 10.61             | <b>0.01</b> | <b>0.53</b>     | <b>(0.33 - 0.84)</b> |
| Mental retardation                      | 14              | 3.65              | 58                  | 4.84              | 0.43        | 0.79            | (0.44 - 1.42)        |
| Psychosis NOS/other                     | 9               | 2.35              | 36                  | 3.01              | 0.50        | 0.77            | (0.37 - 1.61)        |
| <b>Respiratory diseases</b>             |                 |                   |                     |                   |             |                 |                      |
| Chronic bronchitis                      | 107             | 27.90             | 284                 | 23.72             | 0.38        | 1.11            | (0.88 - 1.39)        |
| Chronic obstructive pulmonary disease   | 382             | 99.61             | 944                 | 78.84             | <b>0.00</b> | <b>1.21</b>     | <b>(1.06 - 1.37)</b> |
| Asthma                                  | 181             | 47.20             | 583                 | 48.69             | 0.75        | 0.97            | (0.82 - 1.15)        |
| <b>Skin diseases</b>                    |                 |                   |                     |                   |             |                 |                      |
| Dermatitis/atopic eczema                | 50              | 13.04             | 143                 | 11.94             | 0.49        | 1.12            | (0.81 - 1.55)        |
| Psoriasis                               | 150             | 39.11             | 434                 | 36.25             | 0.39        | 1.09            | (0.90 - 1.31)        |
| Chronic ulcer skin                      | 45              | 11.73             | 164                 | 13.70             | 0.36        | 0.85            | (0.61 - 1.19)        |
| <b>Endocrine diseases</b>               |                 |                   |                     |                   |             |                 |                      |
| Hyperthyroidism/thyrotoxicosis          | 111             | 28.94             | 301                 | 25.14             | 0.11        | 1.20            | (0.96 - 1.50)        |
| Hypothyroidism/myxoedema                | 114             | 29.73             | 374                 | 31.24             | 0.93        | 1.01            | (0.81 - 1.25)        |
| Diabetes mellitus                       | 586             | 152.80            | 1864                | 155.68            | 0.48        | 0.96            | (0.87 - 1.07)        |
| Gout                                    | 142             | 37.03             | 419                 | 35.00             | 0.93        | 0.99            | (0.81 - 1.20)        |
| Lipid disorder                          | 508             | 132.46            | 1559                | 130.21            | 0.60        | 1.03            | (0.92 - 1.15)        |
| Endocrine/metabolic/nutritional disease | 49              | 12.78             | 125                 | 10.44             | 0.17        | 1.26            | (0.90 - 1.76)        |
| <b>Urogenital diseases</b>              |                 |                   |                     |                   |             |                 |                      |
| Incontinence urine                      | 101             | 26.34             | 404                 | 33.74             | 0.10        | 0.83            | (0.66 - 1.04)        |
| Congenital anomaly urinary tract        | 17              | 4.43              | 62                  | 5.18              | 0.50        | 0.83            | (0.48 - 1.42)        |
| Glomerulonephritis/nephrosis            | 23              | 6.00              | 64                  | 5.35              | 0.60        | 1.14            | (0.70 - 1.83)        |
| Benign prostatic hypertrophy            | 297             | 77.44             | 740                 | 61.81             | 0.33        | 1.08            | (0.93 - 1.25)        |
| <b>Total number of patients</b>         | <b>3835</b>     |                   | <b>11973</b>        |                   |             |                 |                      |

<sup>1</sup> Prev: lifetime prevalence per 1000 persons

<sup>2</sup> OR: odds ratio adjusted for sex and age

Supplementary Tables - Chronic diseases among older cancer survivors

**e-Table 3.** Incidence of subsequent chronic diseases after cancer diagnosis or reference date

|                                          | Cancer patients |                  | Non-cancer patients |                  | P-value     | OR          | (95% CI)             |
|------------------------------------------|-----------------|------------------|---------------------|------------------|-------------|-------------|----------------------|
|                                          | N               | Inc <sup>1</sup> | N                   | Inc <sup>1</sup> |             |             |                      |
| <b>Sensory diseases</b>                  |                 |                  |                     |                  |             |             |                      |
| Retinopathy                              | 14              | 1.21             | 101                 | 2.16             | 0.05        | 0.57        | (0.32 - 0.99)        |
| Macular degeneration                     | 25              | 2.15             | 126                 | 2.67             | 0.33        | 0.81        | (0.53 - 1.24)        |
| Blindness                                | 3               | 0.26             | 16                  | 0.34             | 0.67        | 0.77        | (0.22 - 2.63)        |
| Otosclerosis                             | 0               | 0.00             | 2                   | 0.04             | -           | -           | -                    |
| Deafness                                 | 30              | 2.72             | 80                  | 1.77             | 0.06        | 1.50        | (0.99 - 2.29)        |
| <b>Cardiovascular diseases</b>           |                 |                  |                     |                  |             |             |                      |
| Ischemic heart disease with angina       | 65              | 6.29             | 294                 | 7.03             | 0.36        | 0.88        | (0.67 - 1.15)        |
| Acute myocardial infarction              | 54              | 5.10             | 226                 | 5.20             | 0.70        | 0.94        | (0.70 - 1.27)        |
| Ischemic heart disease without angina †  | 71              | 6.76             | 308                 | 7.17             | 0.50        | 0.92        | (0.71 - 1.19)        |
| Heart failure <sup>Ω</sup>               | 94              | 8.31             | 380                 | 8.28             | 0.80        | 0.97        | (0.77 - 1.22)        |
| Pulmonary heart disease <sup>β</sup>     | 7               | 0.59             | 14                  | 0.29             | 0.15        | 1.94        | (0.78 - 4.83)        |
| Hypertension with organ damage           | 41              | 3.67             | 250                 | 5.55             | <b>0.01</b> | <b>0.66</b> | <b>(0.48 - 0.92)</b> |
| Stroke/cerebrovascular accident          | 92              | 8.27             | 435                 | 9.81             | 0.08        | 0.82        | (0.65 - 1.03)        |
| Atherosclerosis                          | 26              | 2.27             | 128                 | 2.76             | 0.31        | 0.80        | (0.53 - 1.22)        |
| Peripheral vascular disease              | 60              | 5.43             | 206                 | 4.54             | 0.24        | 1.19        | (0.89 - 1.59)        |
| Venous thrombosis                        |                 |                  |                     |                  |             |             |                      |
| Baseline – 2 years                       | 45              | 9.27             | 40                  | 2.11             | <b>0.00</b> | <b>4.20</b> | <b>(2.74 - 6.44)</b> |
| 2 years – end of follow-up <sup>β</sup>  | 20              | 3.10             | 58                  | 2.11             | 0.15        | 1.45        | (0.87 - 2.41)        |
| <b>Locomotor impairment</b>              |                 |                  |                     |                  |             |             |                      |
| Back syndrome without radiating pain     | 36              | 3.31             | 143                 | 3.22             | 0.79        | 1.05        | (0.73 - 1.51)        |
| Acquired deformity of spine              | 7               | 0.61             | 39                  | 0.84             | 0.46        | 0.74        | (0.33 - 1.65)        |
| Rheumatoid/seropositive arthritis †      | 12              | 1.04             | 66                  | 1.43             | 0.31        | 0.73        | (0.39 - 1.35)        |
| Osteoarthritis hip                       | 66              | 6.05             | 268                 | 6.11             | 0.95        | 1.01        | (0.77 - 1.32)        |
| Osteoarthritis knee                      | 61              | 5.68             | 270                 | 6.25             | 0.60        | 0.93        | (0.70 - 1.23)        |
| Osteoarthritis other                     | 26              | 2.32             | 149                 | 3.30             | 0.12        | 0.72        | (0.48 - 1.09)        |
| Osteoporosis                             | 99              | 8.93             | 354                 | 7.90             | 0.15        | 1.18        | (0.94 - 1.47)        |
| Acquired deformity of limb               | 11              | 0.97             | 65                  | 1.42             | 0.28        | 0.70        | (0.37 - 1.33)        |
| <b>Neurological - Disability</b>         |                 |                  |                     |                  |             |             |                      |
| Poliomyelitis                            | 0               | 0.00             | 0                   | 0.00             | -           | -           | -                    |
| Congenital neurological anomaly          | 0               | 0.00             | 2                   | 0.04             | -           | -           | -                    |
| Multiple sclerosis                       | 1               | 0.08             | 1                   | 0.02             | 0.32        | 4.12        | (0.26 - 65.91)       |
| Parkinsonism                             | 19              | 1.62             | 59                  | 1.24             | 0.35        | 1.28        | (0.76 - 2.15)        |
| Epilepsy                                 | 12              | 1.03             | 39                  | 0.82             | 0.55        | 1.22        | (0.64 - 2.33)        |
| <b>Neurological - Pain</b>               |                 |                  |                     |                  |             |             |                      |
| Migraine                                 | 1               | 0.09             | 18                  | 0.38             | 0.14        | 0.22        | (0.03 - 1.67)        |
| Cluster headache                         | 0               | 0.00             | 3                   | 0.06             | -           | -           | -                    |
| Trigeminal neuralgia                     | 2               | 0.17             | 5                   | 0.10             | 0.53        | 1.69        | (0.33 - 8.72)        |
| <b>Psychological disorders</b>           |                 |                  |                     |                  |             |             |                      |
| Limited function/disability <sup>Δ</sup> | 5               | 0.42             | 13                  | 0.27             | -           | -           | -                    |
| Dementia †                               | 83              | 7.16             | 417                 | 8.93             | 0.07        | 0.81        | (0.64 - 1.02)        |
| Organic psychosis                        | 12              | 1.02             | 38                  | 0.79             | 0.52        | 1.24        | (0.64 - 2.37)        |

Supplementary Tables - Chronic diseases among older cancer survivors

|                                           | Cancer patients |                  | Non-cancer patients |                  | P-value     | OR          | (95% CI)             |
|-------------------------------------------|-----------------|------------------|---------------------|------------------|-------------|-------------|----------------------|
|                                           | N               | Inc <sup>1</sup> | N                   | Inc <sup>1</sup> |             |             |                      |
| Schizophrenia                             | 0               | 0.00             | 5                   | 0.10             | -           | -           | -                    |
| Affective psychosis                       | 4               | 0.34             | 7                   | 0.15             | 0.21        | 2.18        | (0.64 - 7.48)        |
| Anxiety disorder/anxiety state            | 12              | 1.03             | 43                  | 0.91             | 0.64        | 1.16        | (0.61 - 2.21)        |
| Somatization disorder                     | 1               | 0.09             | 4                   | 0.08             | 1.00        | 0.99        | (0.11 - 8.92)        |
| Depressive disorder                       | 35              | 3.17             | 97                  | 2.16             | 0.05        | 1.47        | (1.00 - 2.17)        |
| Suicide/suicide attempt                   | 1               | 0.08             | 8                   | 0.17             | 0.52        | 0.51        | (0.06 - 4.07)        |
| Phobia/compulsive disorder                | 1               | 0.08             | 3                   | 0.06             | 0.78        | 1.37        | (0.14 - 13.26)       |
| Personality disorder                      | 4               | 0.34             | 31                  | 0.65             | 0.23        | 0.53        | (0.19 - 1.49)        |
| Mental retardation                        | 1               | 0.08             | 2                   | 0.04             | 0.46        | 2.48        | (0.22 - 27.92)       |
| Psychosis NOS/other                       | 4               | 0.34             | 11                  | 0.23             | 0.51        | 1.47        | (0.47 - 4.62)        |
| <b>Respiratory diseases</b>               |                 |                  |                     |                  |             |             |                      |
| Chronic bronchitis                        | 7               | 0.61             | 19                  | 0.40             | 0.36        | 1.50        | (0.63 - 3.56)        |
| Chronic obstructive pulmonary disease     | 95              | 8.81             | 378                 | 8.56             | 0.97        | 1.00        | (0.80 - 1.25)        |
| Asthma                                    | 14              | 1.25             | 91                  | 2.00             | 0.10        | 0.62        | (0.36 - 1.10)        |
| <b>Skin diseases</b>                      |                 |                  |                     |                  |             |             |                      |
| Dermatitis/atopic eczema                  | 7               | 0.60             | 16                  | 0.34             | 0.24        | 1.70        | (0.70 - 4.13)        |
| Psoriasis                                 | 22              | 1.94             | 67                  | 1.45             | 0.22        | 1.35        | (0.83 - 2.18)        |
| Chronic ulcer skin                        | 4               | 0.34             | 50                  | 1.05             | 0.03        | 0.33        | (0.12 - 0.91)        |
| <b>Endocrine diseases</b>                 |                 |                  |                     |                  |             |             |                      |
| Hyperthyroidism/thyrotoxicosis            | 24              | 2.10             | 63                  | 1.35             | 0.06        | 1.57        | (0.98 - 2.51)        |
| Hypothyroidism/myxoedema                  | 20              | 1.75             | 91                  | 1.96             | 0.75        | 0.93        | (0.57 - 1.50)        |
| Diabetes mellitus <sup>β</sup>            | 133             | 13.46            | 589                 | 14.79            | 0.31        | 0.91        | (0.75 - 1.09)        |
| Gout                                      | 34              | 2.99             | 141                 | 3.06             | 0.78        | 0.95        | (0.65 - 1.38)        |
| Lipid disorder                            |                 |                  |                     |                  |             |             |                      |
| Baseline – 2 years                        | 16              | 3.66             | 129                 | 7.62             | <b>0.01</b> | <b>0.49</b> | <b>(0.29 - 0.82)</b> |
| 2 years – end of follow-up                | 31              | 5.27             | 171                 | 7.08             | 0.16        | 0.76        | (0.52 - 1.11)        |
| Endocrine/metabolic/nutritional disease   |                 |                  |                     |                  |             |             |                      |
| Baseline – 7 years                        | 13              | 1.25             | 40                  | 0.95             | 0.37        | 1.33        | (0.71 - 2.49)        |
| 7 years – end of follow-up                | 0               | 0.00             | 7                   | 1.30             | -           | -           | -                    |
| <b>Urogenital diseases</b>                |                 |                  |                     |                  |             |             |                      |
| Incontinence urine                        | 23              | 2.00             | 64                  | 1.38             | 0.09        | 1.51        | (0.94 - 2.43)        |
| Congenital anomaly urinary tract          | 1               | 0.08             | 3                   | 0.06             | 0.76        | 1.42        | (0.15 - 13.66)       |
| Glomerulonephritis/nephrosis <sup>δ</sup> | 6               | 0.51             | 21                  | 0.44             | 0.76        | 1.15        | (0.46 - 2.85)        |
| Benign prostatic hypertrophy              | 27              | 5.05             | 223                 | 10.87            | <b>0.00</b> | <b>0.46</b> | <b>(0.31 - 0.69)</b> |
| <b>Total number of patients</b>           | <b>3835</b>     |                  | <b>11973</b>        |                  |             |             |                      |

<sup>1</sup> Inc: incidence per 1000 person years at risk

<sup>2</sup> HR: hazard ratio adjusted for sex, age, diabetes, cardiovascular, and respiratory diseases

<sup>†</sup> Adjusted for cardiovascular diseases as time varying coefficient

<sup>Ω</sup> Adjusted for age, and sex as time varying coefficient

<sup>β</sup> Adjusted for age as time varying coefficient

<sup>Δ</sup> Cox proportional hazards assumption was violated due to small numbers we were unable to split survival time

<sup>δ</sup> Adjusted for sex as time varying coefficient
